# Supplementary material
Source: PubMed Central journal article supplement (PMC3624206)
Supplement: JVI.02882-12_zjv999097354so1.pdf [file JVI.02882-12_zjv999097354so1.pdf]

1 **Supplementary information.**

2

3 **Supplementary Movie 1.** Confocal z-stack reconstructions of aUY11 (**S1A**) and dUY11  
4 (**S1B**) in cellular membranes, counterstained with the general membrane dye PKH26.  
5 Vero cell monolayers were exposed to PKH26 general membrane dye for 10 minutes at  
6 37°C. Cells were washed and then exposed to aUY11 for 5 minutes or dUY11 for 15  
7 minutes at 37°C. Images were acquired as z-stacks of 26 slices (each 0.46 µm thick) for  
8 aUY11 or 20 slices (each 0.55 µm thick) for dUY11 using a Leica SP5 laser scanning  
9 confocal microscope. Green (aUY11 or dUY11) and red (PKH26) channels were merged  
10 using LAS software. Z-stack images were adjusted for brightness/contrast and  
11 reconstructed with Fiji ImageJ.
